# Supplementary material for: Effects of a community-driven water, sanitation and hygiene intervention on water and sanitation infrastructure, access, behaviour, and governance: a cluster-randomised controlled trial in rural Democratic Republic of Congo
Source: PubMed Central journal article supplement — BMJ Glob Health. 2021 May 17;6(5):e005030. doi: 10.1136/bmjgh-2021-005030 (PMC8130731; doi:10.1136/bmjgh-2021-005030), 2021-05-17
Supplement: bmjgh-2021-005030supp001.pdf [file bmjgh-2021-005030supp001.pdf]

## Supporting information

The following pages contain four additional tables referenced in the main manuscript:

Table S1. Subgroup analysis by conflict: effect of the intervention on time spent collecting water, quantity of water collected, quality of water source, and quality of sanitation facility

Table S2. Subgroup analysis by respondent education level: effect of the intervention on time spent collecting water, quantity of water collected, quality of water source, and quality of sanitation facility

Table S3. Subgroup analysis by gender: effect of the intervention on time spent collecting water

Table S4. Components of summary indices: effect of the intervention on indices of handwashing, sanitation practices, water storage, child health, school attendance, cost of water, water satisfaction, water quality & access, and water governance

**Table S1. Subgroup analysis by conflict: effect of the intervention on time spent collecting water, quantity of water collected, quality of water source, and quality of sanitation facility**

| Outcome                      | Conflict exposure | Control |       | Intervention |       | ITT  | 95% CI            |  |
|------------------------------|-------------------|---------|-------|--------------|-------|------|-------------------|--|
|                              |                   | N       | Mean  | N            | Mean  |      |                   |  |
| Time to collect water        | No conflict       | 480     | 64.95 | 476          | 57.48 | -4.5 | ( -23.0 to 14.0 ) |  |
|                              | Conflict          | 252     | 81.63 | 104          | 80.14 | 2.0  | ( -32.9 to 37.0 ) |  |
| Improved water source        | No conflict       | 480     | 0.51  | 476          | 0.84  | 0.28 | ( 0.17 to 0.38 )  |  |
|                              | Conflict          | 252     | 0.28  | 104          | 0.83  | 0.53 | ( 0.32 to 0.74 )  |  |
| Quantity of water collected  | No conflict       | 480     | 38.18 | 476          | 41.94 | 2.3  | ( -4.9 to 9.5 )   |  |
|                              | Conflict          | 252     | 35.31 | 104          | 39.76 | 2.2  | ( -10.0 to 14.4 ) |  |
| Improved sanitation facility | No conflict       | 480     | 0.21  | 476          | 0.47  | 0.25 | ( 0.14 to 0.36 )  |  |
|                              | Conflict          | 252     | 0.11  | 104          | 0.39  | 0.28 | ( 0.04 to 0.52 )  |  |

ITT= intention-to-treat effect estimate. The model includes controls for randomization blocks based on province and number of villages per cluster. There were 121 clusters total. Time spent collecting water and total quantity of water collected were Winsorized at the 99th percentile. No conflict = village has not experienced armed conflict. Conflict = village has experienced armed conflict.

**Table S2. Subgroup analysis by respondent education level: effect of the intervention on time spent collecting water, quantity of water collected, quality of water source, and quality of sanitation facility**

| Outcome                      | Education level         | Control |      | Intervention |      | ITT  | 95% CI |      |    |      |   |
|------------------------------|-------------------------|---------|------|--------------|------|------|--------|------|----|------|---|
|                              |                         | N       | Mean | N            | Mean |      | (      | to   | )  |      |   |
| Time to collect water        | Less than primary educ. | 489     | 72   | 367          | 62   | -3   | (      | -21  | to | 15   | ) |
|                              | Primary or more         | 243     | 68   | 213          | 60   | -2   | (      | -22  | to | 18   | ) |
| Improved water source        | Less than primary educ. | 489     | 0.45 | 367          | 0.83 | 0.31 | (      | 0.18 | to | 0.43 | ) |
|                              | Primary or more         | 243     | 0.40 | 213          | 0.84 | 0.40 | (      | 0.28 | to | 0.51 | ) |
| Quantity of water collected  | Less than primary educ. | 489     | 40   | 367          | 42   | -1   | (      | -9   | to | 6    | ) |
|                              | Primary or more         | 243     | 31   | 213          | 41   | 8    | (      | 0    | to | 16   | ) |
| Improved sanitation facility | Less than primary educ. | 489     | 0.15 | 367          | 0.41 | 0.24 | (      | 0.12 | to | 0.35 | ) |
|                              | Primary or more         | 243     | 0.23 | 213          | 0.54 | 0.30 | (      | 0.16 | to | 0.44 | ) |

ITT= intention-to-treat effect estimate. The model includes controls for randomization blocks based on province and number of villages per cluster. There were 121 clusters total. Time spent collecting water and total quantity of water collected were Winsorized at the 99th percentile. Education level corresponds to that of the respondent, typically the head woman of the household.

**Table S3. Subgroup analysis by gender: effect of the intervention on time spent collecting water (minutes)**

| Water collector               | Control |       | Intervention |       | ITT  | 95% CI            |
|-------------------------------|---------|-------|--------------|-------|------|-------------------|
|                               | N       | Mean  | N            | Mean  |      |                   |
| Head woman                    | 732     | 33.1  | 580          | 29.2  | -2.2 | ( -10.9 to 6.5 )  |
| Female children of head woman | 640     | 129.7 | 510          | 128.0 | 12.1 | ( -24.9 to 49.1 ) |

ITT= intention-to-treat effect estimate. The model includes controls for randomization blocks based on province and number of villages per cluster. There were 121 clusters total. Time spent collecting water was Winsorized at the 99th percentile. For female children of the head woman, time spent collecting water the previous day is the sum across all such persons

**Table S4. Components of summary indices: effect of the intervention on indices of handwashing, sanitation practices, water storage, child health, school attendance, cost of water, water satisfaction, water quality & access, and water governance**

| Indices and index components                                     | Control |       | Intervention |       | ITT   | 95% CI             |  |
|------------------------------------------------------------------|---------|-------|--------------|-------|-------|--------------------|--|
|                                                                  | N       | Mean  | N            | Mean  |       |                    |  |
| <b>Handwashing practices index</b>                               | 732     | 0.00  | 580          | 0.61  | 0.48  | ( 0.25 to 0.71 )   |  |
| Washed hands with soap/ash since yesterday                       | 732     | 0.64  | 580          | 0.80  | 0.07  | ( 0.00 to 0.13 )   |  |
| When necessary to wash hands with soap? (unprompted)             |         |       |              |       |       |                    |  |
| After using toilet                                               | 732     | 0.62  | 580          | 0.82  | 0.17  | ( 0.09 to 0.24 )   |  |
| After washing baby's bottom/changing diaper                      | 732     | 0.23  | 580          | 0.41  | 0.13  | ( 0.06 to 0.21 )   |  |
| After eating                                                     | 732     | 0.59  | 580          | 0.62  | 0.08  | ( -0.01 to 0.17 )  |  |
| Before preparing food                                            | 732     | 0.29  | 580          | 0.50  | 0.14  | ( 0.07 to 0.21 )   |  |
| Before eating                                                    | 732     | 0.76  | 580          | 0.78  | 0.05  | ( -0.02 to 0.12 )  |  |
| Before feeding / breastfeeding baby                              | 732     | 0.20  | 580          | 0.41  | 0.16  | ( 0.10 to 0.22 )   |  |
| Before or after handling children                                | 732     | 0.13  | 580          | 0.26  | 0.11  | ( 0.04 to 0.17 )   |  |
| After taking care of pets or farm animals                        | 732     | 0.09  | 580          | 0.13  | 0.02  | ( -0.04 to 0.09 )  |  |
| After coughing/sneezing                                          | 732     | 0.06  | 580          | 0.11  | 0.03  | ( -0.03 to 0.09 )  |  |
| After coming back from the fields                                | 732     | 0.27  | 580          | 0.40  | 0.08  | ( 0.00 to 0.15 )   |  |
| Owens handwashing device                                         | 732     | 0.05  | 580          | 0.19  | 0.14  | ( 0.08 to 0.19 )   |  |
| <b>Sanitation practices index</b>                                | 732     | 0.00  | 580          | 0.48  | 0.28  | ( 0.12 to 0.44 )   |  |
| No open defecation                                               | 732     | 0.78  | 580          | 0.87  | 0.09  | ( 0.03 to 0.15 )   |  |
| Has anyone ever emptied latrine?                                 | 531     | 0.02  | 468          | 0.04  | 0.02  | ( 0.00 to 0.04 )   |  |
| If yes, how many times in last two weeks?                        | 12      | 2.33  | 17           | 2.41  | -2.04 | ( -4.23 to 0.14 )  |  |
| Has anyone ever cleaned this latrine?                            | 531     | 0.42  | 468          | 0.52  | 0.02  | ( -0.07 to 0.11 )  |  |
| If yes, how many times in last two weeks?                        | 218     | 4.71  | 242          | 5.34  | 0.87  | ( 0.07 to 1.67 )   |  |
| In last 18 months, any improvements to latrine?                  | 563     | 0.16  | 493          | 0.23  | 0.07  | ( 0.01 to 0.13 )   |  |
| Safe feces disposal                                              | 706     | 0.61  | 562          | 0.70  | 0.02  | ( -0.03 to 0.08 )  |  |
| No flies observed                                                | 732     | 0.48  | 580          | 0.59  | 0.02  | ( -0.06 to 0.10 )  |  |
| No mosquitoes observed                                           | 732     | 0.37  | 580          | 0.47  | 0.02  | ( -0.06 to 0.10 )  |  |
| Times/week living space cleaned                                  | 732     | 7.13  | 580          | 7.56  | -0.04 | ( -0.58 to 0.51 )  |  |
| Appropriate waste disposal                                       | 732     | 0.50  | 580          | 0.73  | 0.20  | ( 0.12 to 0.28 )   |  |
| <b>Water storage practices index</b>                             | 732     | 0.00  | 580          | -0.21 | -0.11 | ( -0.28 to 0.05 )  |  |
| Does this household own a pot for water storage?                 | 732     | 0.90  | 580          | 0.83  | -0.04 | ( -0.11 to 0.02 )  |  |
| Is the water from the pot clean?                                 | 657     | 0.86  | 479          | 0.87  | 0.00  | ( -0.06 to 0.05 )  |  |
| Is the water from the pot covered?                               | 657     | 0.83  | 479          | 0.90  | 0.08  | ( 0.03 to 0.13 )   |  |
| Does the pot have a clean cup?                                   | 657     | 0.67  | 479          | 0.56  | -0.08 | ( -0.17 to 0.02 )  |  |
| <b>Child health index</b>                                        | 448     | 0.00  | 377          | -0.11 | -0.06 | ( -0.22 to 0.11 )  |  |
| Diarrhea, children 10-59 months old, last two weeks              | 742     | 0.32  | 646          | 0.27  | -0.02 | ( -0.11 to 0.05 )  |  |
| Fever, children 10-59 months old, last two weeks                 | 742     | 0.59  | 646          | 0.51  | -0.04 | ( -0.10 to 0.03 )  |  |
| Cough, children 10-59 months old, last two weeks                 | 742     | 0.51  | 646          | 0.49  | 0.01  | ( -0.06 to 0.09 )  |  |
| <b>School attendance index</b>                                   | 702     | 0.00  | 558          | -0.02 | -0.09 | ( -0.20 to 0.03 )  |  |
| Proportion of children in school                                 | 702     | 0.43  | 558          | 0.39  | -0.03 | ( -0.06 to 0.00 )  |  |
| If in school, how many days last week?                           | 506     | 4.61  | 387          | 5.02  | 0.05  | ( -0.20 to 0.30 )  |  |
| <b>Financial cost of water index</b>                             | 732     | 0.00  | 580          | 0.14  | 0.13  | ( -0.10 to 0.36 )  |  |
| Does it cost money to use water point?                           | 732     | 0.04  | 580          | 0.06  | 0.02  | ( -0.03 to 0.06 )  |  |
| If yes, how much paid in last week? (Congolese Francs)           | 42      | 539   | 33           | 269   | 3.6   | ( -39.9 to 47.1 )  |  |
| <b>Water satisfaction index</b>                                  | 732     | 0.00  | 580          | 0.65  | 0.64  | ( 0.43 to 0.85 )   |  |
| Satisfaction with water access (1=very unsatisfied; 5=very sat.) | 732     | 2.91  | 580          | 3.84  | 0.89  | ( 0.55 to 1.23 )   |  |
| Percent of water points respondent is satisfied with             | 729     | 52.24 | 575          | 78.87 | 27.04 | ( 18.90 to 35.18 ) |  |
| <b>Water quality &amp; access index</b>                          | 183     | 0.00  | 145          | 0.23  | 0.13  | ( -0.18 to 0.44 )  |  |
| Number water points in village                                   | 183     | 2.42  | 145          | 2.08  | -0.09 | ( -0.53 to 0.34 )  |  |

|                                                                      |     |        |     |        |       |                    |
|----------------------------------------------------------------------|-----|--------|-----|--------|-------|--------------------|
| Number functional water points in village                            | 162 | 2.31   | 139 | 1.91   | -0.28 | ( -0.67 to 0.11 )  |
| Number functional improved water points in village                   | 183 | 0.23   | 145 | 0.46   | 0.19  | ( -0.02 to 0.40 )  |
| Negative of num. breakdowns in functional water points last 6 months | 183 | -2.06  | 145 | -0.77  | 0.64  | ( -0.02 to 1.30 )  |
| Negative of breakdown length functional WPs, last 6mo (mo)           | 183 | -3.66  | 145 | -2.32  | 0.17  | ( -2.21 to 2.54 )  |
| Repair took less than a month (1) or more than a month(0)            | 83  | 0.61   | 46  | 0.62   | 0.06  | ( -0.13 to 0.24 )  |
| Mean water trips per HH in village                                   | 183 | 5.49   | 145 | 5.92   | 0.10  | ( -0.70 to 0.91 )  |
| Negative of mean distance water point to village center (min)        | 158 | -22.30 | 132 | -19.30 | 1.00  | ( -3.71 to 5.72 )  |
| Negative of mean time to fill (min)                                  | 183 | -2.60  | 145 | -1.62  | 0.97  | ( 0.13 to 1.81 )   |
| Mean months per year water point is available                        | 158 | 11.24  | 132 | 10.08  | -1.02 | ( -1.73 to -0.32 ) |
| Proportion water points with excellent water quality                 | 158 | 0.39   | 132 | 0.59   | 0.14  | ( 0.05 to 0.24 )   |
| <b>Water governance index</b>                                        | 183 | 0.00   | 145 | 1.33   | 1.33  | ( 1.12 to 1.54 )   |
| Presence group that reports to community about water mgmt            | 183 | 0.32   | 145 | 0.75   | 0.43  | ( 0.31 to 0.55 )   |
| Presence WASH committee                                              | 183 | 0.27   | 145 | 0.95   | 0.68  | ( 0.58 to 0.78 )   |
| Number members WASH committee                                        | 84  | 6.11   | 139 | 7.61   | 1.68  | ( 0.96 to 2.39 )   |
| Ratio women to men, WASH committee                                   | 82  | 0.39   | 139 | 0.75   | 0.30  | ( 0.14 to 0.45 )   |
| Presence water maintenance system                                    | 183 | 0.50   | 145 | 0.81   | 0.29  | ( 0.17 to 0.41 )   |
| Negative of months since last visit by health zone official          | 35  | -9.80  | 49  | -10.88 | -2.05 | ( -8.19 to 4.08 )  |
| Community is satisfied with health zone                              | 183 | 0.51   | 145 | 0.72   | 0.21  | ( 0.09 to 0.32 )   |
| Community is satisfied with health area                              | 182 | 0.64   | 144 | 0.76   | 0.09  | ( -0.04 to 0.21 )  |
| Community is satisfied with national government                      | 183 | 0.52   | 145 | 0.54   | 0.08  | ( -0.05 to 0.21 )  |

ITT= intention-to-treat effect estimate. The model includes controls for randomization blocks based on province and number of villages per cluster. There were 121 clusters total. Indices are calculated by rescaling each variable in each index (e.g. handwashing) so that higher values imply better outcomes, then standardizing relative to the control group, following Kling et al. (2007). Effects on are in standard deviation units.
